# Supplementary material for: Current Status of Raf Kinase Inhibitor Protein (RKIP) in Lung Cancer: Behind RTK Signaling
Source: PubMed Central journal article supplement (PMC6562953; doi:10.3390/cells8050442), 2019-05-10
Supplement: cells-08-00442-s001.pdf [file cells-08-00442-s001.pdf]

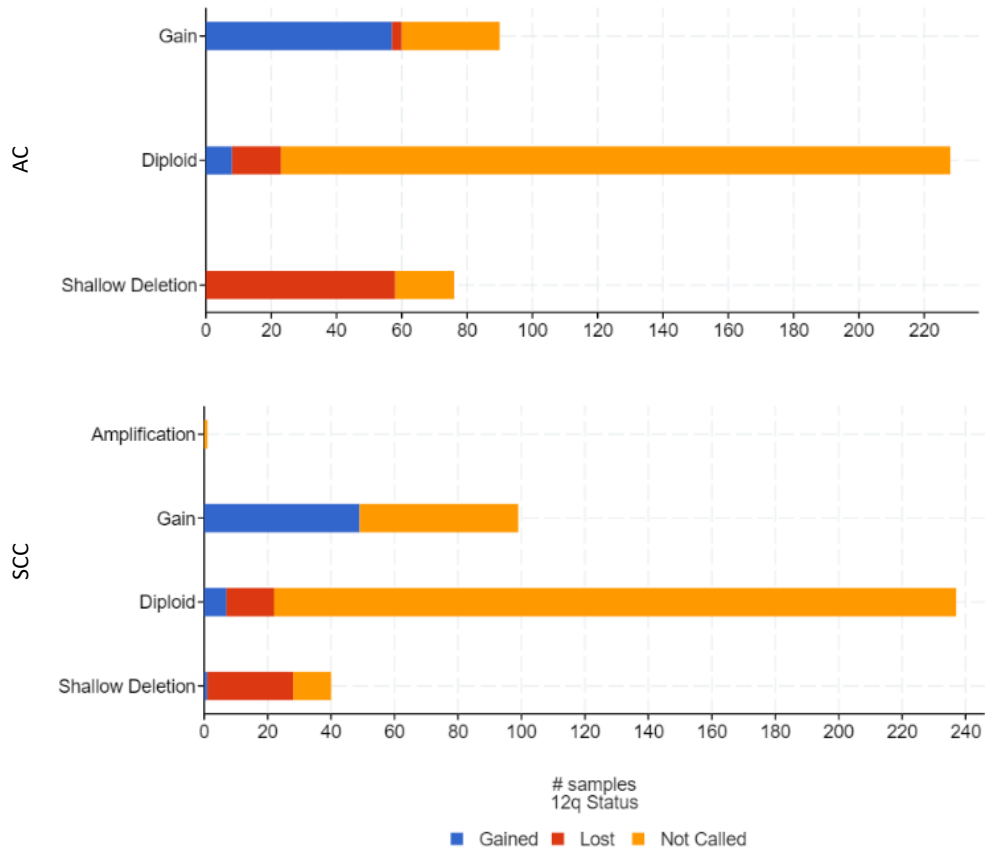

**Figure S1:** NSCLC TCGA data regarding *PEBP1* copy number variations status according 12q chromosome status (refers to 510 AC cases and 484 SCC cases). All the data is from TCGA PanCancer Atlas, available at [www.cbioportal.org](http://www.cbioportal.org). NSCLC: Non-Small Cell Lung Carcinoma; AC: Adenocarcinoma; SCC: Squamous cell Carcinoma.
